# Supplementary material
Source: PubMed Central journal article supplement (PMC4195761)
Supplement: embj0033-1784-sd1.pdf [file embj0033-1784-sd1.pdf]

# Supplementary Figure S1

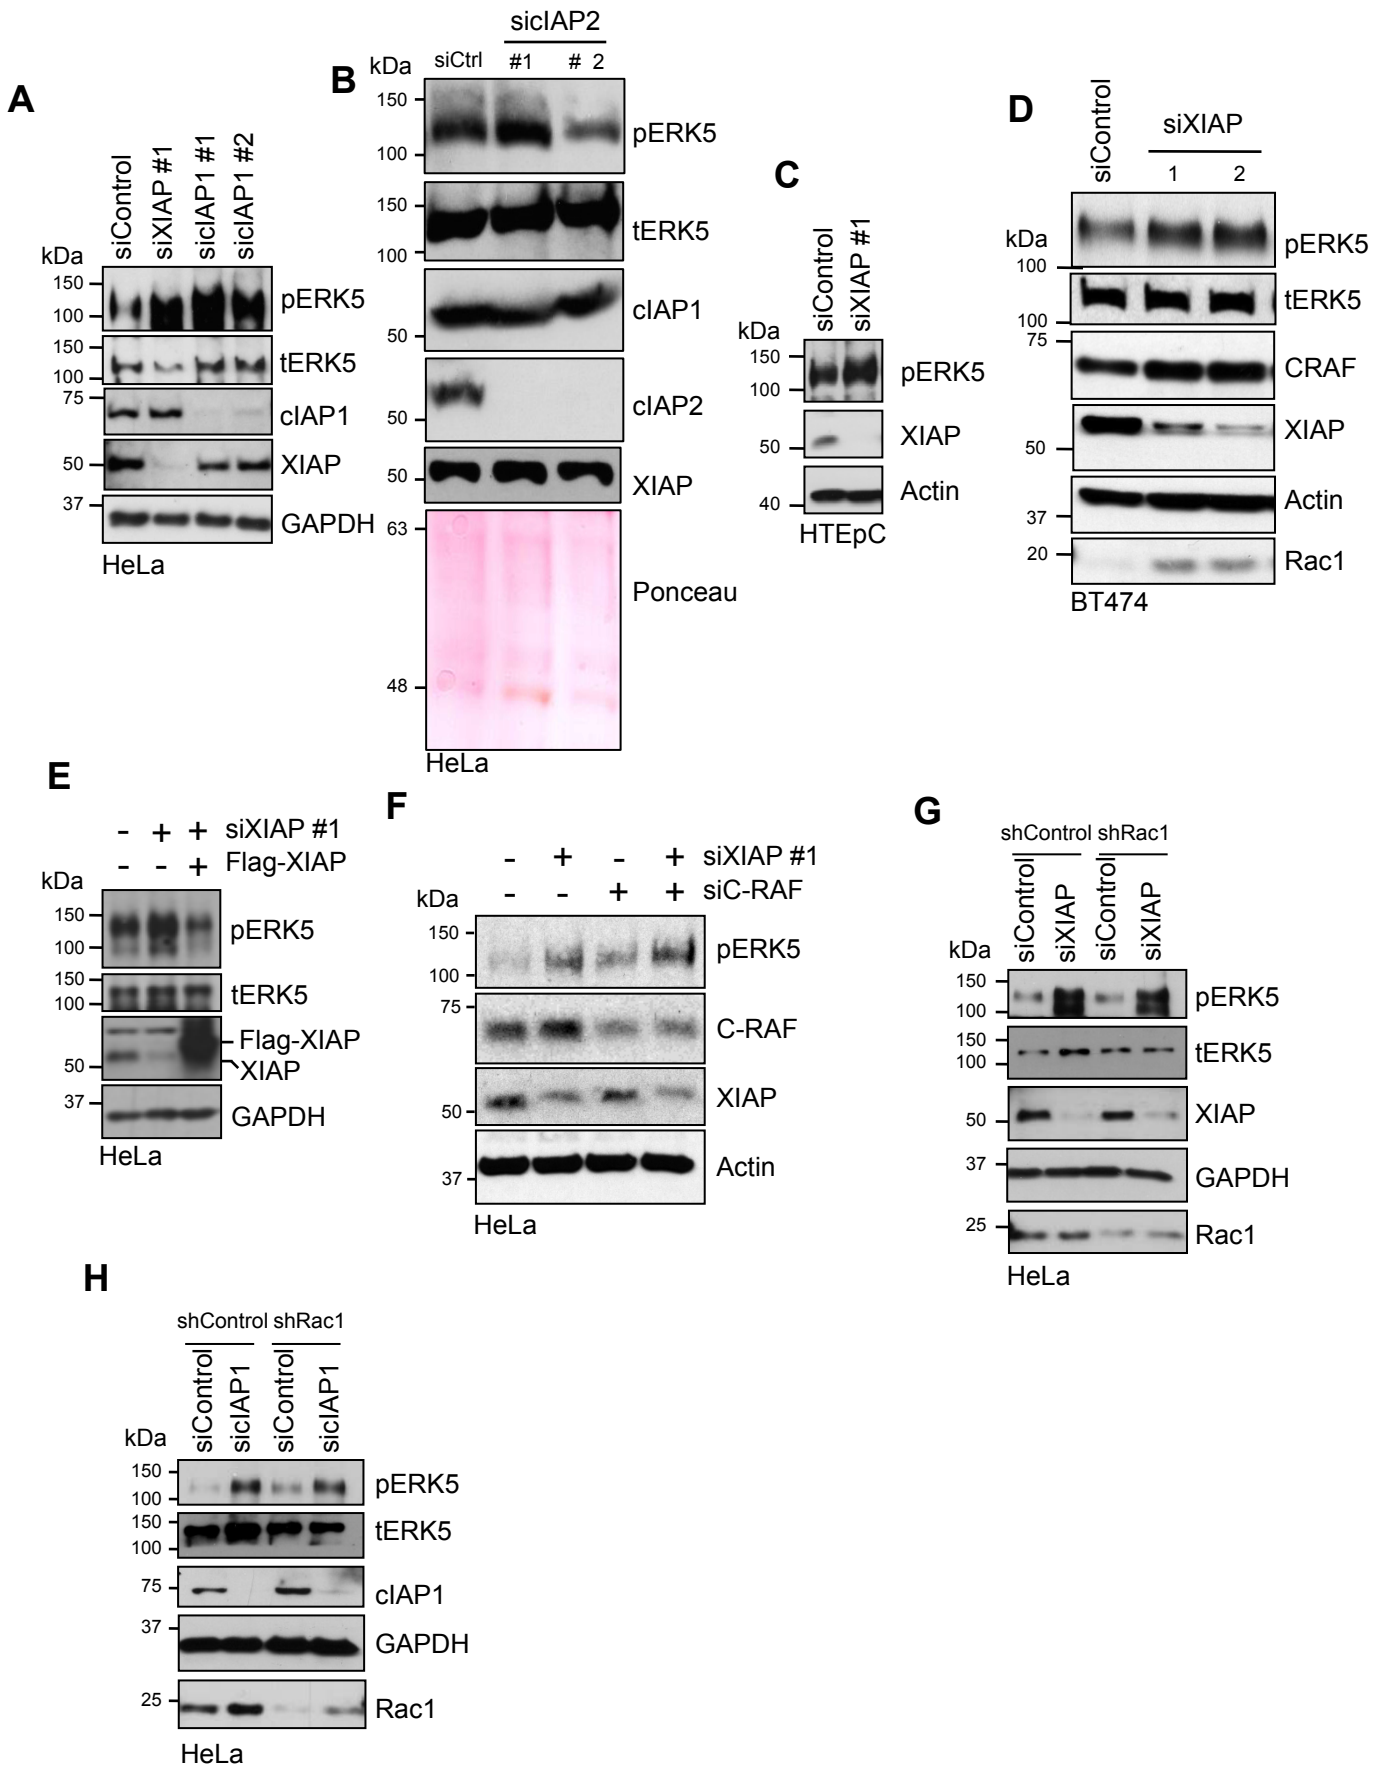

### **Supplementary Figure S1**

(A) HeLa cells were transiently transfected with siRNA against XIAP or cIAP1 and the activation of ERK5 was assessed by immunoblots. (B) HeLa cells were transfected with cIAP2 siRNAs as mentioned in (A) and the activation of ERK5 was assessed by immunoblots. (C) HTEpC cells were transiently transfected with siControl or siXIAP and the phosphorylation of ERK5 and the depletion of XIAP were monitored. (D) BT474 cells were transiently transfected with siRNA against XIAP and phosphorylation of ERK5 and various proteins was detected by immunoblots. (E) HeLa cells were transfected with either XIAP-3'UTR siRNAs alone or together with Flag–XIAP construct. The activation of ERK5 was monitored by immunoblots. (F) HeLa cells were co-transfected with siRNAs against XIAP and C-RAF and the activation of ERK5 was analyzed. (G and H) HeLa cells stably transduced with shRNA against Rac1 were transiently transfected with siRNA against XIAP (G) or cIAP1 (H) and the phosphorylation of ERK5 was monitored by immunoblots.
