# Supplementary material
Source: PubMed Central journal article supplement (PMC4195761)
Supplement: embj0033-1784-sd2.pdf [file embj0033-1784-sd2.pdf]

## Supplementary Figure S2



### **Supplementary Figure S2**

(A) Details of XIAP GST-tagged constructs. (B) BIR1 and BIR2 bind to MEKK2 although with less affinity than full length XIAP. In vitro translated MEKK2-wt protein was incubated with different GST constructs of XIAP and GST pull-down was performed. The reticulolysates and GST fraction were analyzed by Ponceau staining and western blotting. Details of the XIAP constructs are shown in S2A. The BSA band was shown (\*).

(C) Depletion of XIAP leads to an increase in MEK5 binding to MEKK2 *in vivo*. HeLa cells were transfected with siControl or siXIAP and endogenous MEKK2 was immunoprecipitated with the specific antibody. Total lysates and IP fraction were analyzed by western blotting.
