# Supplementary material
Source: PubMed Central journal article supplement (PMC4195761)
Supplement: embj0033-1784-sd4.pdf [file embj0033-1784-sd4.pdf]

## Supplementary Figure S4

**A**

| Protein Name | Position | Modified Sequence         | PEP      | Charge | m/z      |
|--------------|----------|---------------------------|----------|--------|----------|
| MEKK2        | K360     | _LGK(g)LLGQGAFGR_         | 0,005473 | 3      | 444,2579 |
| MEKK2        | K450     | _DQLK(g)AYGALTENVTR_      | 1,25E-19 | 2      | 896,963  |
| MEKK2        | K485     | _DIK(g)GANILR_            | 0,014834 | 2      | 557,3224 |
| MEKK2        | K602     | _IFVEAK(g)LRPSADELLR_     | 0,050382 | 4      | 493,531  |
| MEKK3        | K143     | _IK(g)ASQSAGDINTIYQPPEPR_ | 0,000485 | 3      | 767,0608 |
| MEKK3        | K456     | _DQLK(g)AYGALTESVTR_      | 0,05263  | 3      | 589,3075 |
| MEKK3        | K504     | _DSAGNVK(g)LGDFGASK_      | 0,000206 | 2      | 790,3892 |

**B**

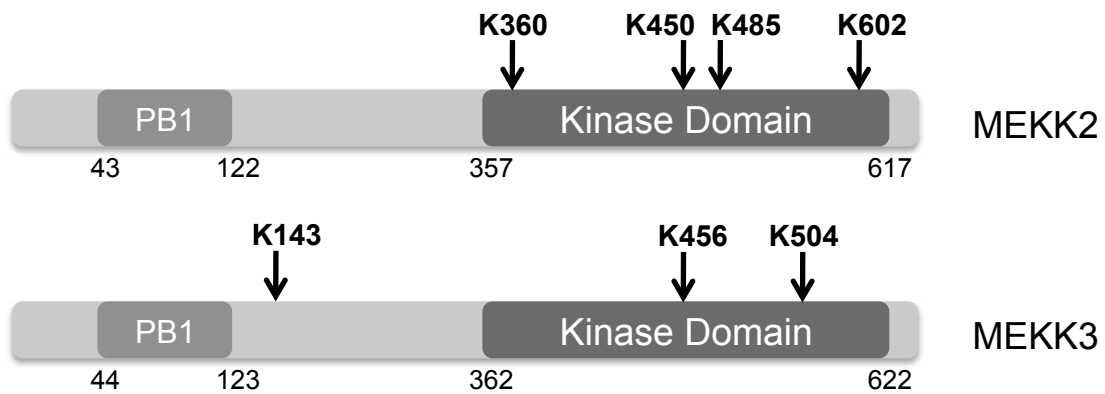

**C**

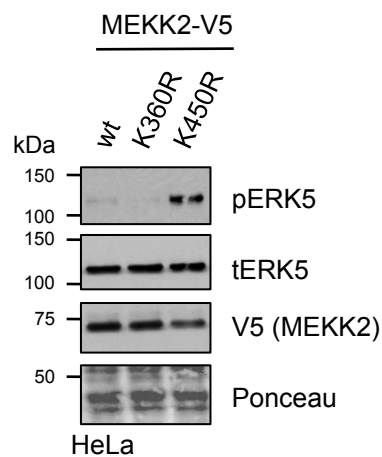

## **Supplementary Figure S4**

### **Characterization of the potential ubiquitination sites on MEKK2 targeted by XIAP.**

(A) Enlisted are the lysines found to be ubiquitinated in MEKK2 and MEKK3 by XIAP and cIAP1. MEKK2 and MEKK3 were ubiquitinated *in vitro* using either cIAP1 or XIAP and run on an SDS-PAGE gel. The gel was stained with Coomassie and the observed MEKK2/3 ubiquitination bands were spliced and subjected to in-gel trypsin digestion. The peptides were then analyzed for ubiquitinated lysine residues by mass spectroscopy. (B) Representation of the ubiquitination sites on MEKK2 and MEKK3 by XIAP and cIAP1. (C) Mutation of K450 on MEKK2 enhances the activation of ERK5. HeLa cells were transiently transfected with either MEKK2 wt-V5, MEKK2 K360R-V5 or MEKK2 K450R-V5 constructs. Total lysates were analyzed by western blotting.
