# Supplementary material
Source: PubMed Central journal article supplement (PMC4195761)
Supplement: embj0033-1784-sd5.pdf [file embj0033-1784-sd5.pdf]

## Supplementary Figure S5

A



B



### **Supplementary Figure S5**

(A) Coupled ubiquitination–phosphorylation assays revealed that ubiquitination of MEKK3 is required for the inhibition of ERK5 phosphorylation. (B) XIAP-mediated ubiquitination does not interfere with JNK and MKK7 phosphorylations in the reconstituted MEKK3/MKK7/JNK and MEKK2/MKK7/JNK modules.
