# Supplementary material
Source: PubMed Central journal article supplement (PMC4195761)
Supplement: embj0033-1784-sd7.pdf [file embj0033-1784-sd7.pdf]

# Supplementary Figure S7

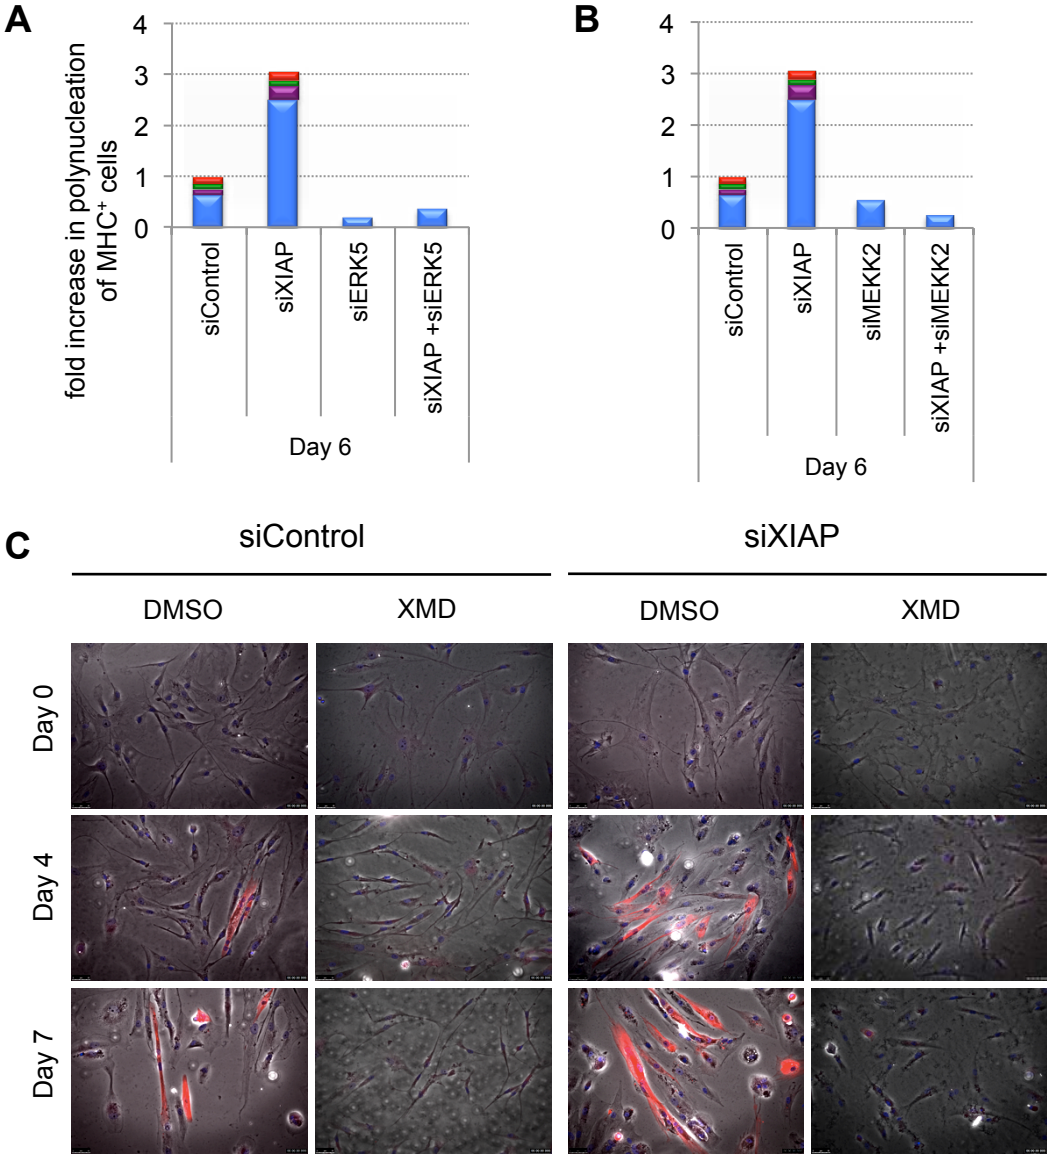

### **Supplementary Figure S7**

(A) HSM cells transfected with various siRNAs were differentiated as mentioned in the methods. The polynucleation index was calculated. Shown are data from a representative experiment. (B) Pharmacological inhibition of ERK5 prevents the enhanced differentiation provoked by XIAP depletion. HSM were transiently transfected with siXIAP and treated with DMSO or 5  $\mu$ M of XMD 8-92 and differentiation was started the day after. Transfection was performed every two days and media and drug treatment was renewed every following day. The cells were lysed, run on SDS-PAGE and blotted for various differentiation markers (lower panel).
