# Supplementary material
Source: PubMed Central journal article supplement (PMC4195761)
Supplement: embj0033-1784-sd12.pdf [file embj0033-1784-sd12.pdf]

**Fig4A**



**Fig4 B**



**Fig4 B**



**Fig4 C**



**Fig4 D**



**Fig4 D**



**Fig4 E**
