# Supplementary material
Source: PubMed Central journal article supplement (PMC4195761)

Fig5A

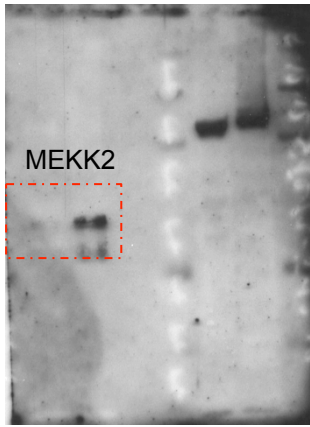

GST-MEKK2

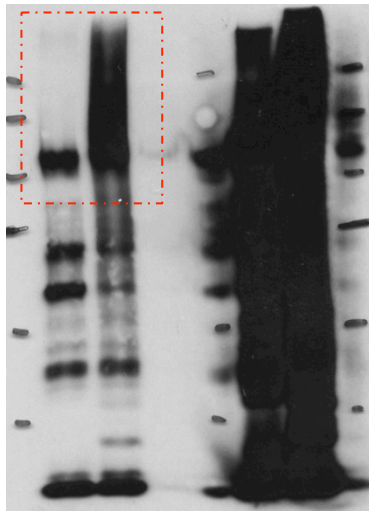

Fig5B

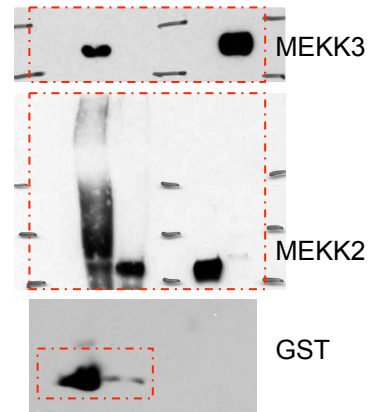

Fig5C

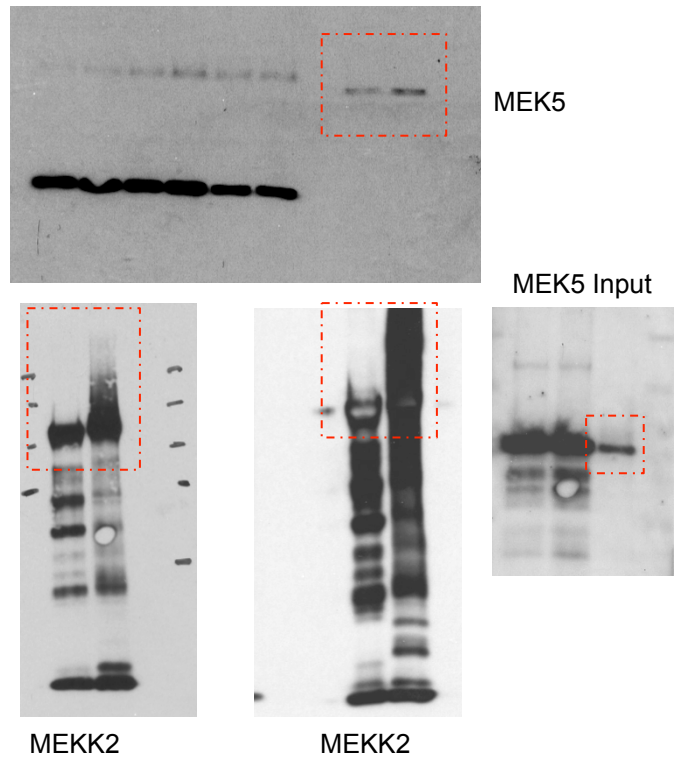

Fig 5D

M: Marker  
 A: MKK5-GST prey  
 B: MEKK3-MBP +MKK5-GST  
 C: Ubiquitinated MEKK3-MBP +MKK5-GST  
 D: MBP control +MKK5-GST

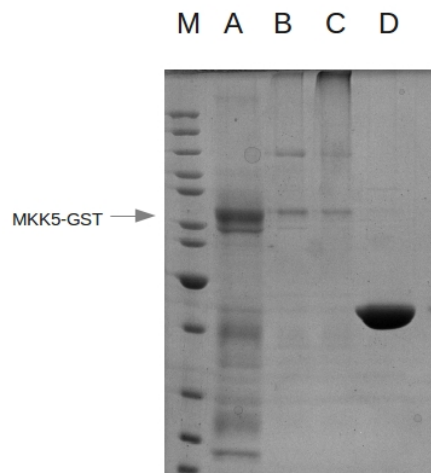

Fig5F

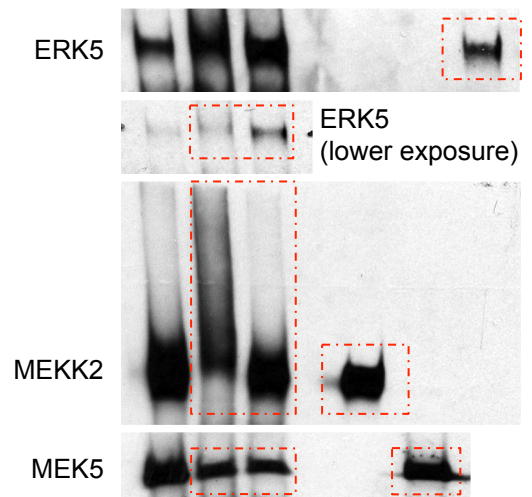

Supplement: embj0033-1784-sd13.pdf [file embj0033-1784-sd13.pdf]
