# Supplementary material
Source: PubMed Central journal article supplement (PMC4195761)

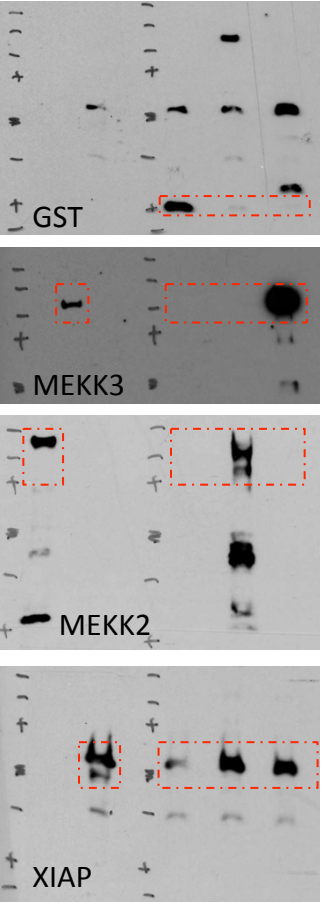

Fig. 2A

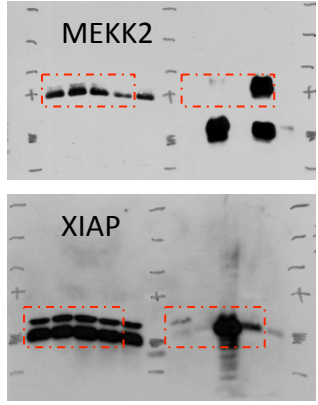

Fig. 2B

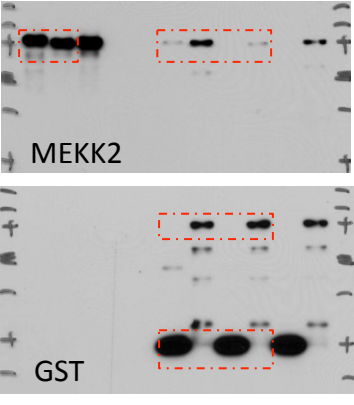

Fig. 2C

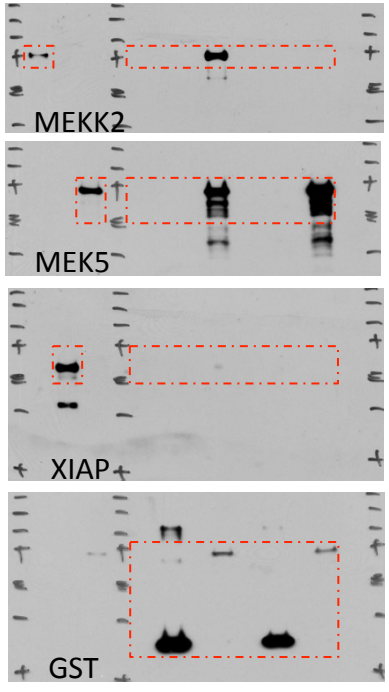

Fig. 2D

Fig. 2F

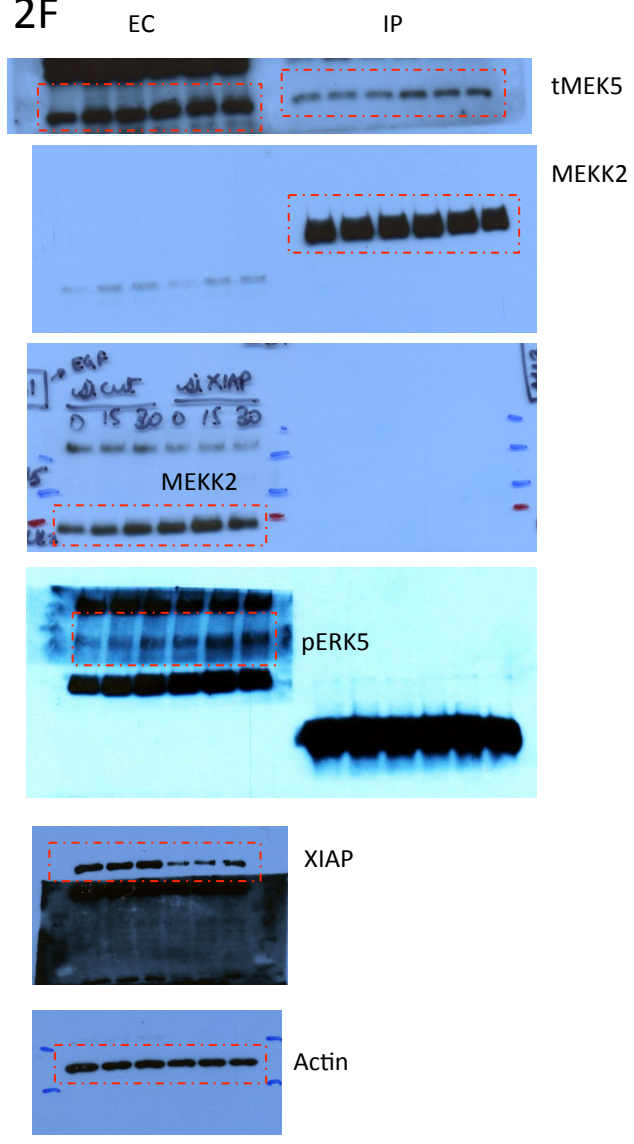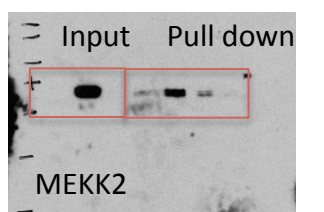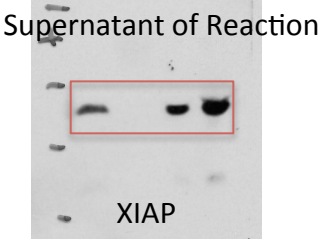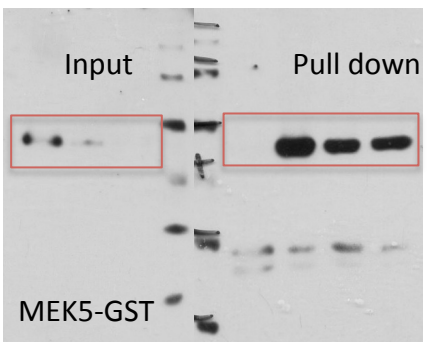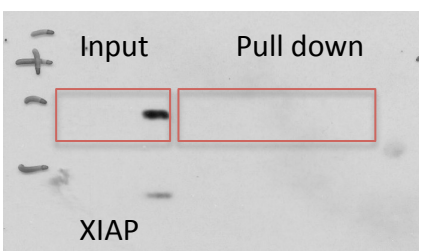

Fig. 2E

Supplement: embj0033-1784-sd10.pdf [file embj0033-1784-sd10.pdf]

**Figure 3A**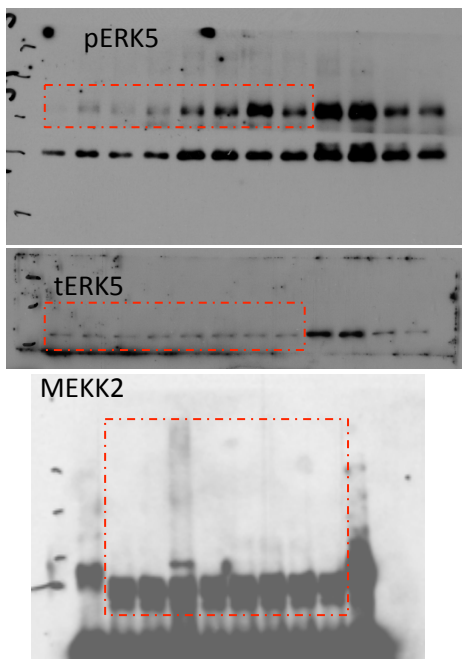**Fig3B**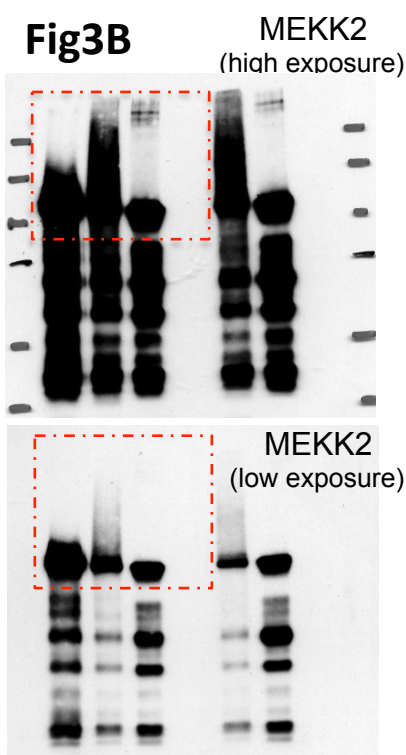**Fig3C**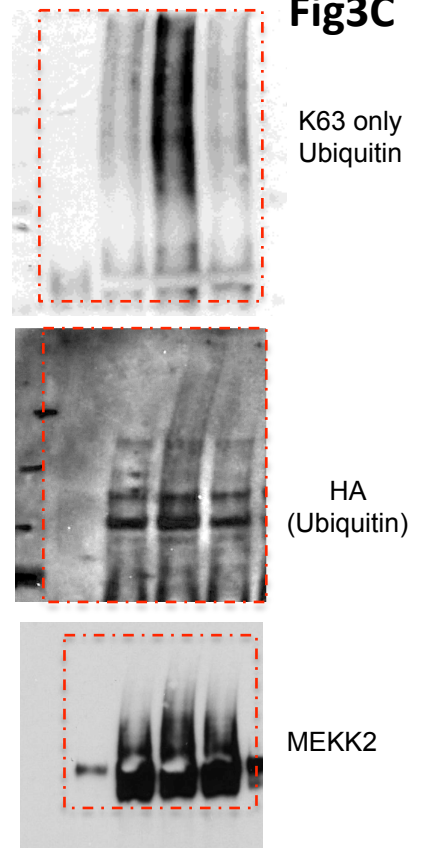**Figure 3D**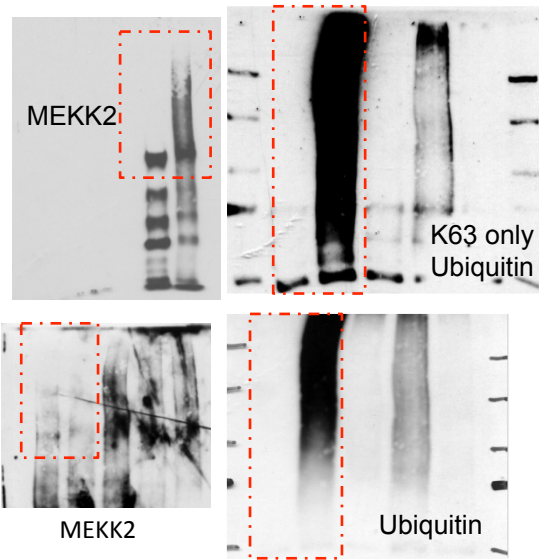**Fig3F**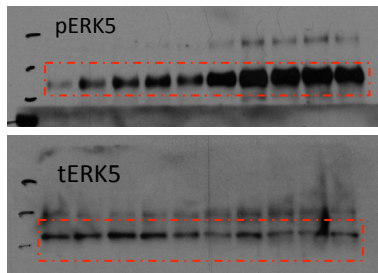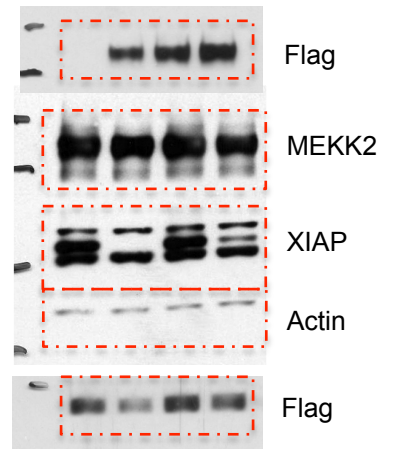**Fig3E**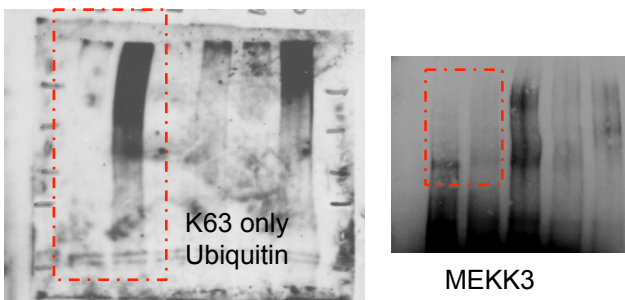**Fig3G**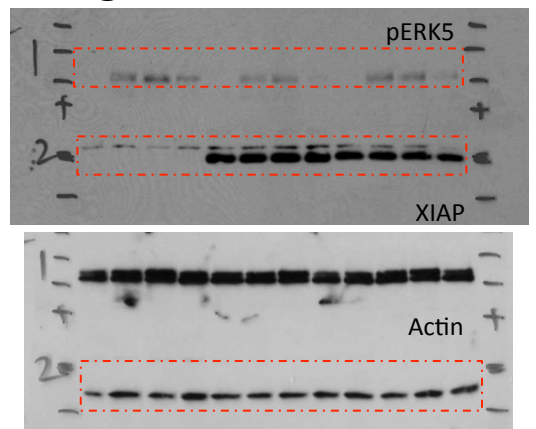

Supplement: embj0033-1784-sd11.pdf [file embj0033-1784-sd11.pdf]

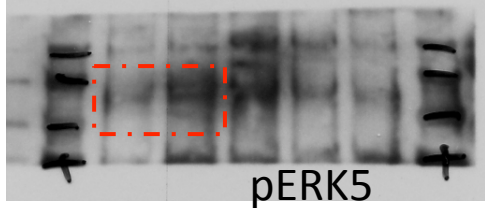

**Fig6A**

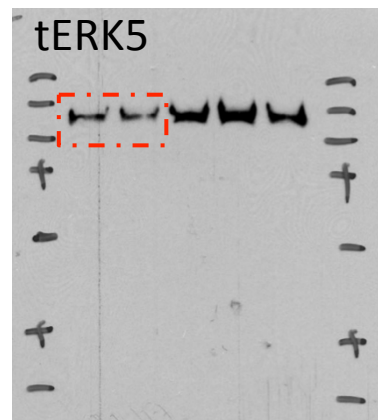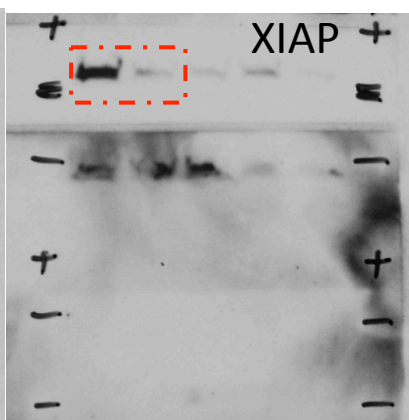

**XIAP**

**Fig6B**

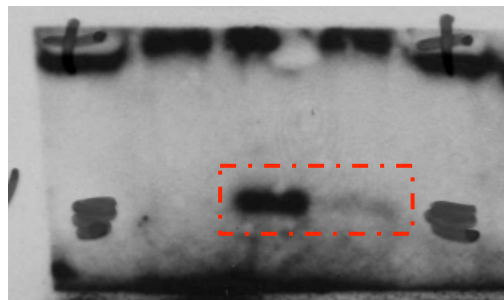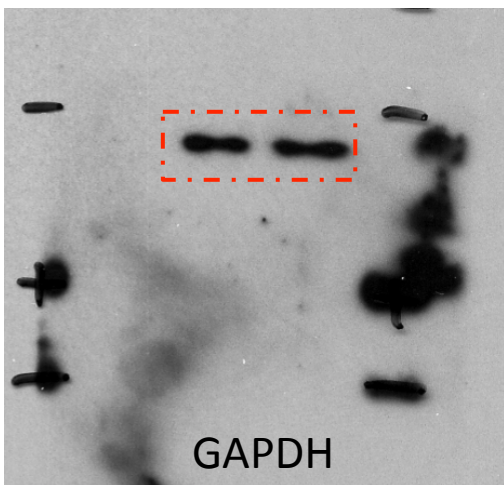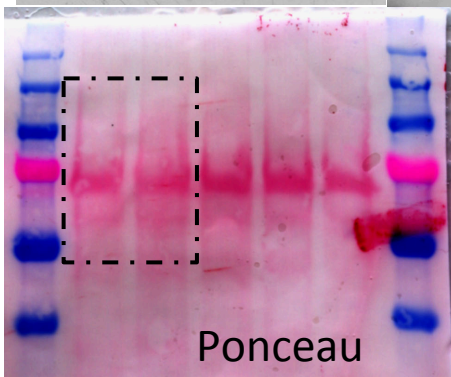

**Ponceau**

**Fig6E**

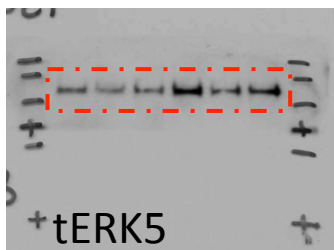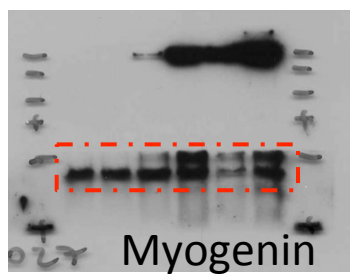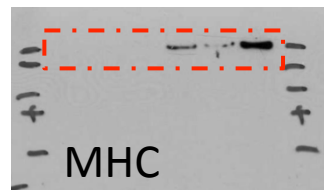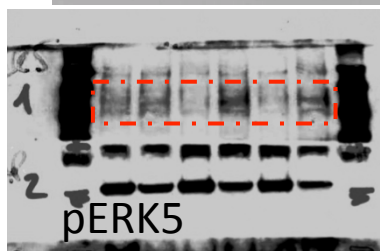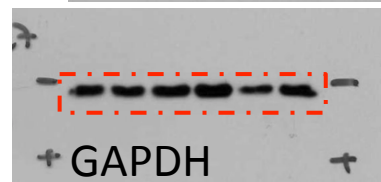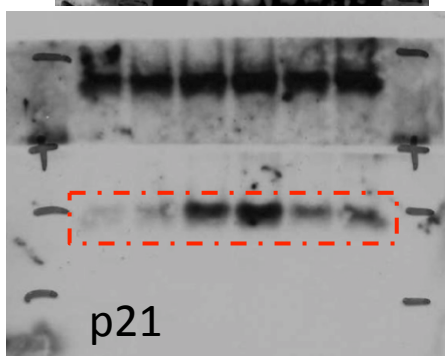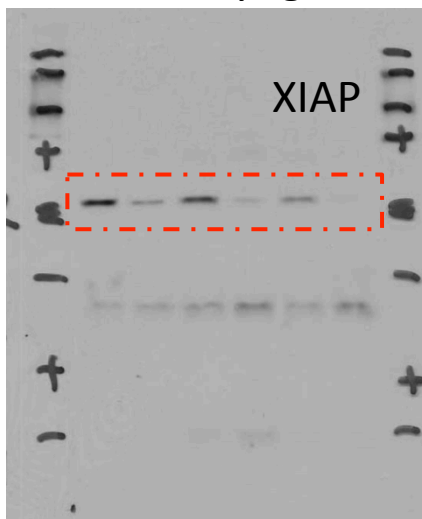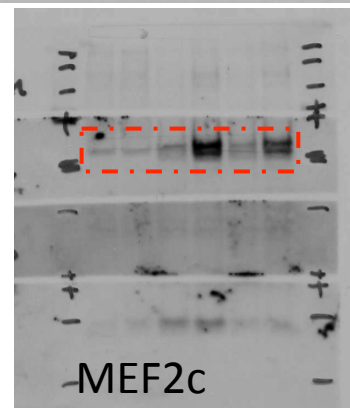

Supplement: embj0033-1784-sd14.pdf [file embj0033-1784-sd14.pdf]

**Fig7B**

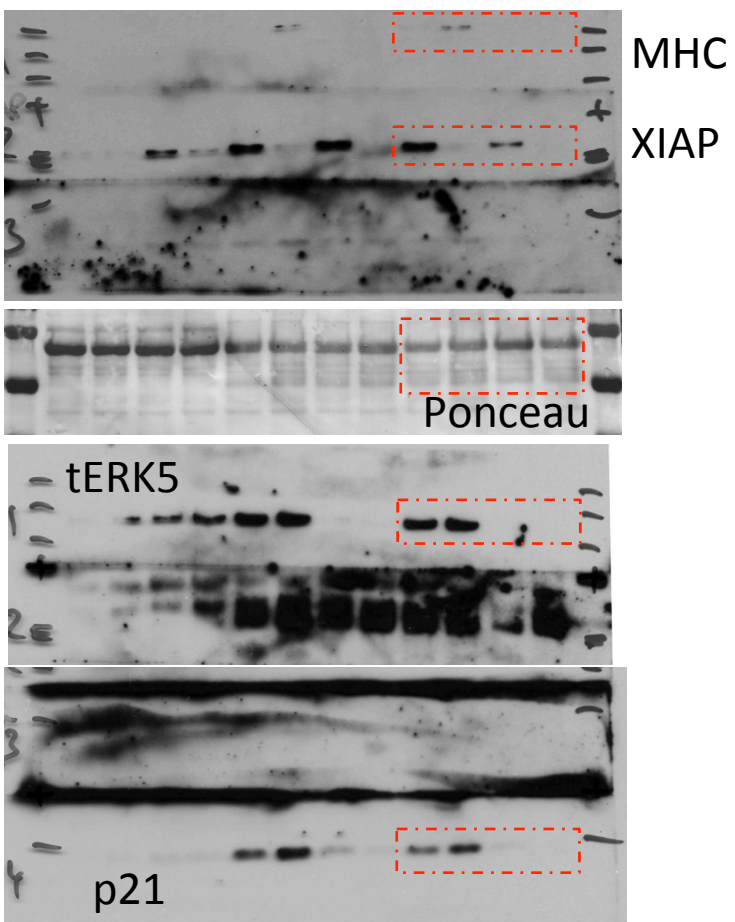

**Fig7D**

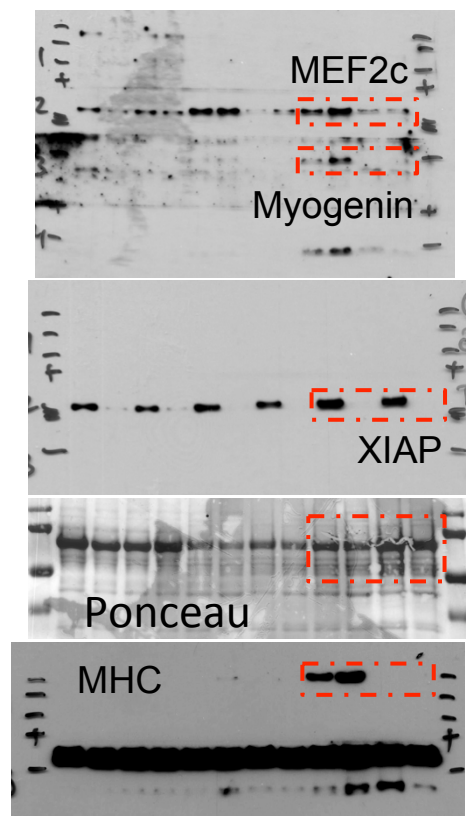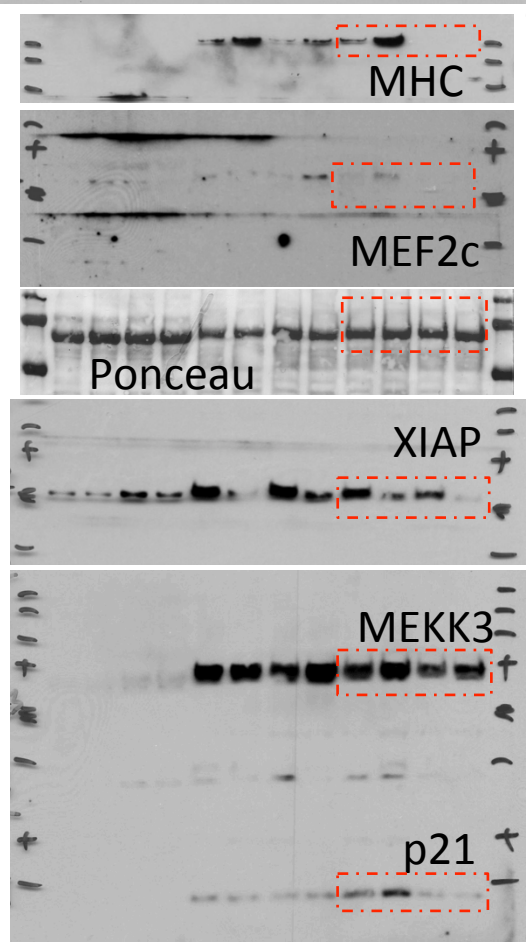

**Fig7G**

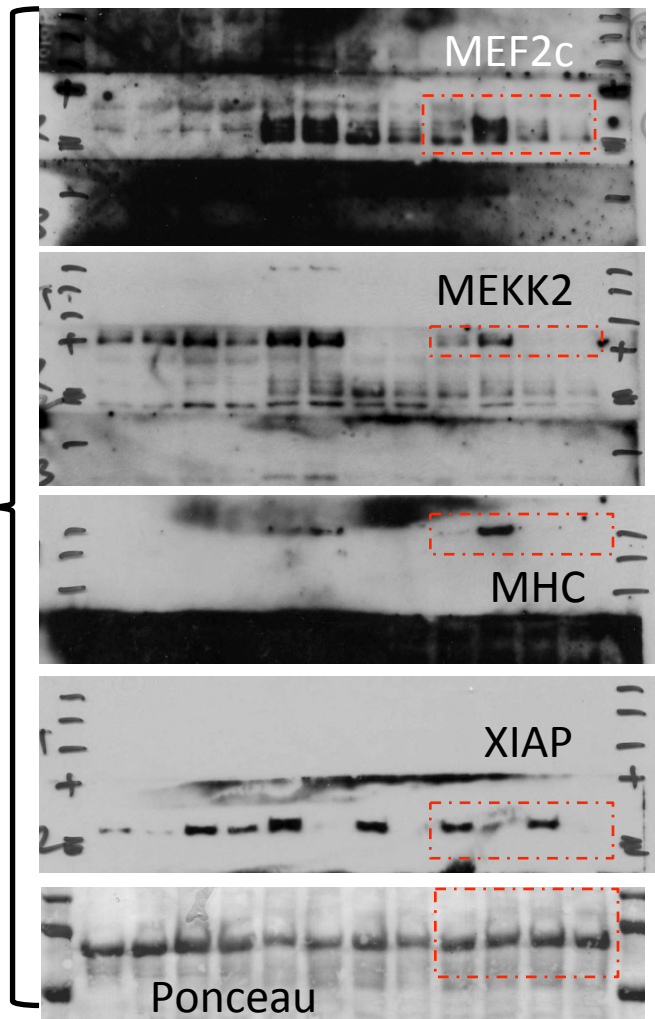

**Fig7F**

Supplement: embj0033-1784-sd15.pdf [file embj0033-1784-sd15.pdf]

**Figure 1A**

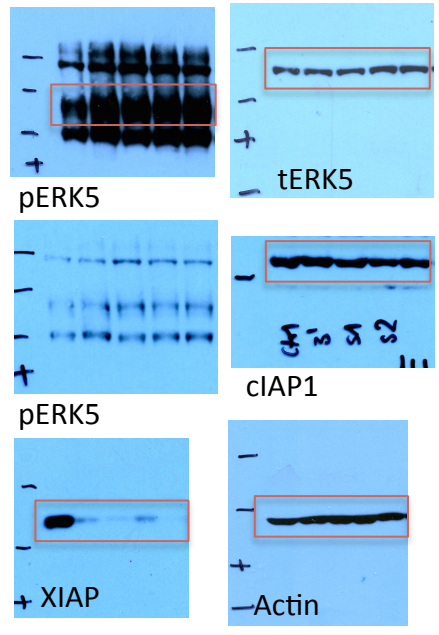

**Figure 1B**

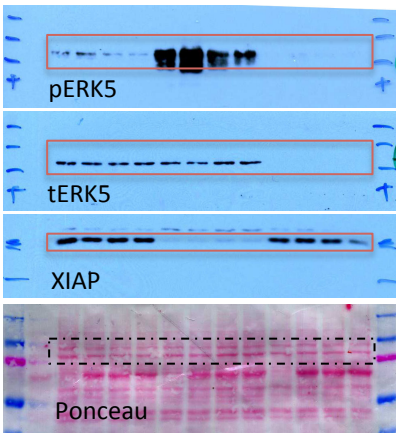

**Figure 1D**

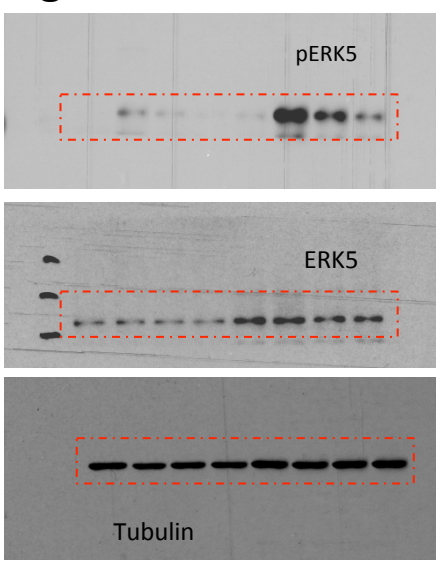

**Figure 1E**

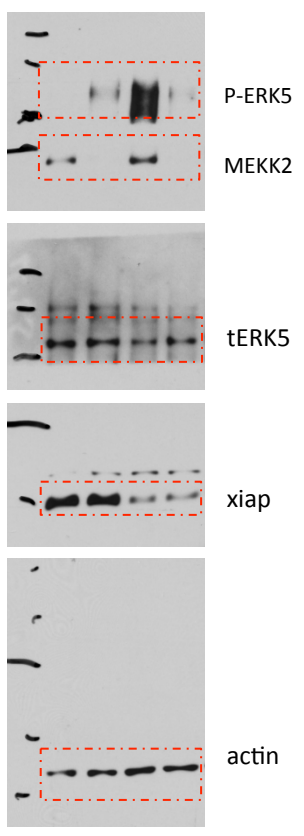

**Figure 1F**

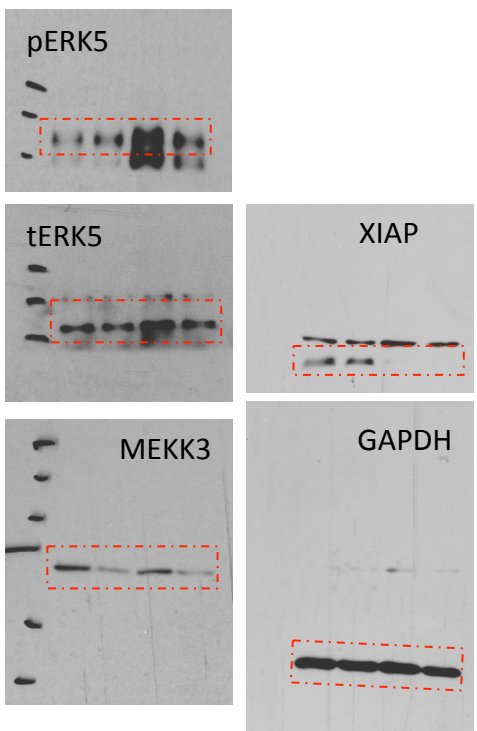

**Figure 1G**

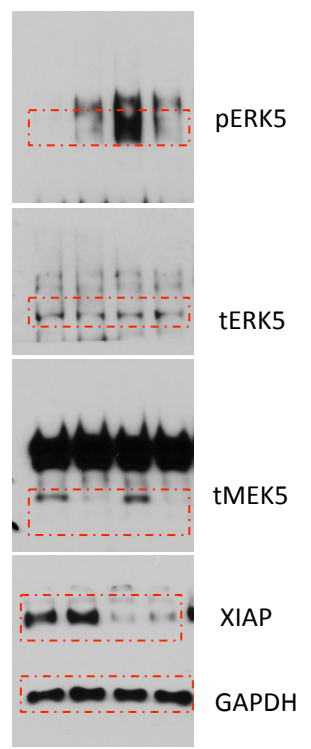

Supplement: embj0033-1784-sd9.pdf [file embj0033-1784-sd9.pdf]
